# Supplementary material for: Exploring the Challenges Facing Pregnant Teenagers in the Sustainable Development Goals Era: Qualitative study in Gauteng Province South Africa
Source: Research Square preprint supplement (doi:10.21203/rs.3.rs-8610559/v1), 2026-01-30
Supplement: Supplementary file 1 [file b0b643f9190d2003b806d617.docx]

**Exploring the Challenges Facing Pregnant Teenagers in the Sustainable Development Goals Era: Qualitative study in Gauteng Province South Africa**

**Appendix 1**

Interview guide in English

**Central Question:** What are the challenges that you are as a pregnant teenager?

**Probing Questions**

1. How does it feel to be a teenager and pregnant at the same time?
2. What was your first reaction when you learned that you were pregnant?
3. What are your physical, psychological and social needs as a pregnant teenager?
4. Are you currently coping with your pregnancy? Which coping mechanisms do you use?
5. Do you have any support structure around during your pregnancy?
6. What measures can be recommended to improve the well-being of pregnant teenagers?
